# Supplementary material
Source: publisher figshare collection journal article supplement (https://gsajournals.figshare.com/ndownloader/files/21191823)
Supplement: Supplementary file 1 [file 21191823]

## Sheet: SPELL results 100 top
Rank	Score	Gene	Common	Protein	SPELL Version 2.0.3 for worm at ip-10-0-1-148 on 2019-09-03 (400 datasets representing 6524 experiments.)
query		WBGene00000615	col-38	cuticle collagen
query		WBGene00000639	col-63	cuticle collagen
query		WBGene00000626	col-49	cuticle collagen
1	24.1	WBGene00000748	col-175	cuticle collagen
2	22.1	WBGene00004394	rol-1	cuticle collagen
3	22.1	WBGene00000647	col-71	cuticle collagen
4	21.7	WBGene00000711	col-138	cuticle collagen
5	19.7	WBGene00008448	E01G4.6	Uncharacterized protein
6	18.7	WBGene00000678	col-104	cuticle collagen
7	18.4	WBGene00000694	col-120	cuticle collagen
8	18.1	WBGene00001067	dpy-5	cuticle collagen
9	17.8	WBGene00021791	Y51H7C.13	Uncharacterized protein
10	17.8	WBGene00000672	col-97	cuticle collagen
11	17.8	WBGene00000252	bli-2	cuticle collagen
12	17.5	WBGene00000636	col-60	cuticle collagen
13	17.5	WBGene00000683	col-109	cuticle collagen
14	17.2	WBGene00000653	col-77	cuticle collagen
15	17	WBGene00000930	dao-4	Dauer or Aging adult Overexpression
16	17	WBGene00000603	col-14	cuticle collagen
17	16.8	WBGene00021627	Y47D7A.15	Uncharacterized protein
18	16.8	WBGene00000625	col-48	cuticle collagen
19	16.1	WBGene00000251	bli-1	cuticle collagen
20	16.1	WBGene00003981	pes-8	Patterned Expression Site
21	15.9	WBGene00000655	col-79	cuticle collagen
22	15.9	WBGene00000649	col-73	cuticle collagen
23	15.6	WBGene00005017	sqt-2	cuticle collagen
24	15.6	WBGene00004398	rol-8	cuticle collagen
25	15.4	WBGene00000663	col-88	cuticle collagen
26	15.3	WBGene00005016	sqt-1	cuticle collagen
27	15.2	WBGene00000704	col-130	cuticle collagen
28	15	WBGene00004397	rol-6	cuticle collagen
29	14.9	WBGene00019236	H23N18.5	Uncharacterized protein
30	14.7	WBGene00022680	ZK180.6	Uncharacterized protein
31	14.5	WBGene00000734	col-161	cuticle collagen
32	14.4	WBGene00020040	R12E2.15	Uncharacterized protein
33	14.3	WBGene00000729	col-156	cuticle collagen
34	14.3	WBGene00006950	wrt-4	Warthog protein 4
35	14.1	WBGene00018297	F41F3.3	Uncharacterized protein
36	14.1	WBGene00001725	grl-16	GRound-Like (Grd related)
37	14.1	WBGene00077697	F58E6.13	Uncharacterized protein
38	13.9	WBGene00000687	col-113	cuticle collagen
39	13.9	WBGene00006952	wrt-6	Warthog protein 6
40	13.9	WBGene00000755	col-182	cuticle collagen
41	13.8	WBGene00020413	T10E9.3	Uncharacterized protein
42	13.8	WBGene00001703	grd-14	GRounDhog (Hedgehog-like family)
43	13.8	WBGene00000666	col-91	cuticle collagen
44	13.8	WBGene00020560	T19C3.2	Uncharacterized protein T19C3.2
45	13.7	WBGene00004300	ram-2	Col_cuticle_N domain-containing protein
46	13.7	WBGene00001066	dpy-4	cuticle collagen
47	13.6	WBGene00000684	col-110	cuticle collagen
48	13.6	WBGene00009355	F33A8.7	Uncharacterized protein
49	13.6	WBGene00015339	C02E7.6	Uncharacterized protein
50	13.5	WBGene00022679	ZK180.5	Uncharacterized protein
51	13.4	WBGene00003057	lon-3	cuticle collagen
52	13.4	WBGene00020033	R12E2.7	Uncharacterized protein
53	13.4	WBGene00000681	col-107	cuticle collagen
54	13.4	WBGene00022649	ZK84.1	Uncharacterized protein
55	13.3	WBGene00001714	grl-5	GRound-Like (Grd related)
56	13.3	WBGene00000727	col-154	cuticle collagen
57	13.2	WBGene00000753	col-180	cuticle collagen
58	13.2	WBGene00001716	grl-7	GRound-Like (Grd related)
59	13.1	WBGene00000634	col-58	cuticle collagen
60	13.1	WBGene00000602	col-13	cuticle collagen
61	13.1	WBGene00021095	mlt-8	Uncharacterized protein
62	13.1	WBGene00009982	F53F1.4	Uncharacterized protein
63	13	WBGene00004139	pqn-54	Prion-like-(Q/N-rich)-domain-bearing protein
64	13	WBGene00004133	abu-13	Activated in Blocked Unfolded protein response
65	13	WBGene00004120	pqn-32	Prion-like-(Q/N-rich)-domain-bearing protein
66	13	WBGene00000718	col-145	cuticle collagen
67	12.9	WBGene00013352	lon-8	Protein lon-8
68	12.9	WBGene00012901	cnp-2	Calcineurin-interacting protein 2 (Calcineurin binding protein 2)
69	12.9	WBGene00008215	C49F8.3	DB domain-containing protein
70	12.9	WBGene00019184	H10E21.4	Uncharacterized protein
71	12.9	WBGene00007999	tag-297	Uncharacterized protein
72	12.8	WBGene00008652	F10D11.6	BPI2 domain-containing protein
73	12.7	WBGene00000699	col-125	cuticle collagen
74	12.7	WBGene00015340	C02E7.7	Uncharacterized protein
75	12.7	WBGene00011460	ttr-14	TransThyretin-Related family domain
76	12.7	WBGene00008851	F15B9.8	Uncharacterized protein
77	12.6	WBGene00000707	col-133	cuticle collagen
78	12.5	WBGene00000665	col-90	cuticle collagen
79	12.5	WBGene00004174	abu-14	Activated in Blocked Unfolded protein response
80	12.5	WBGene00016133	C26B9.3	Uncharacterized protein
81	12.5	WBGene00007344	C05E7.2	Uncharacterized protein
82	12.5	WBGene00000616	col-39	cuticle collagen
83	12.5	WBGene00008260	C52G5.2	DUF1794 domain-containing protein
84	12.5	WBGene00007307	spch-1	SPerm CHromatin enriched
85	12.4	WBGene00017998	F33D4.6	Uncharacterized protein
86	12.4	WBGene00012433	Y11D7A.9	Uncharacterized protein
87	12.3	WBGene00014039	ZK662.2	Uncharacterized protein
88	12.3	WBGene00021625	Y47D7A.13	Uncharacterized protein
89	12.3	WBGene00000710	col-137	cuticle collagen
90	12.3	WBGene00009983	cut-2	Cuticlin-2
91	12.3	WBGene00021779	Y51H7C.1	Uncharacterized protein
92	12.2	WBGene00001695	grd-6	GRounDhog (Hedgehog-like family)
93	12.2	WBGene00000024	abu-1	Activated in Blocked Unfolded protein response
94	12.2	WBGene00000703	col-129	cuticle collagen
95	12.2	WBGene00020283	T06A4.3	Peptidase_M14 domain-containing protein
96	12.1	WBGene00006050	ssq-1	Sperm-Specific family, class Q
97	12.1	WBGene00018737	F53B1.4	NAD(P)-bd_dom domain-containing protein
98	12.1	WBGene00000746	col-173	cuticle collagen
99	12	WBGene00009308	F32A11.3	Uncharacterized protein
100	12	WBGene00007343	C05E7.1	Uncharacterized protein
101	12	WBGene00000685	col-111	cuticle collagen
102	11.9	WBGene00020841	T27A3.5	Tyrosine-protein phosphatase
103	11.9	WBGene00011235	suro-1	Putative carboxypeptidase suro-1 (EC 3.4.17.-) (Suppressor of roller 1)
		blue = cuticle collagen genes

## Sheet: col gene overlap w LIN-29 OE
SPELL	time peak		LIN-29	time peak		overlap	time peak
bli-1	L4		bli-1	L4		bli-1	L4
bli-2	L4		bli-6	L4		col-104	L4
col-104	L4		col-101	Ad		col-107	L2, L4
col-107	L2, L4		col-103	L3, Ad		col-109	L4
col-109	L4		col-104	L4		col-120	L4
col-110	np		col-107	L2, L4		col-129	Ad
col-113	L4		col-109	L4		col-138	L4
col-120	L4		col-120	L4		col-156	np
col-125	np		col-124	Ad		col-182	L2, L4
col-129	Ad		col-129	Ad		col-38	L4
col-13	nd		col-138	L4		col-48	L4
col-130	L4		col-139	Ad		col-49	L4
col-133	L4		col-140	Ad		col-60	L4
col-137	L4		col-142	Ad		col-63	L4
col-138	L4		col-146	np		col-71	L4
col-14	L4		col-149	L3		col-73	L4
col-145	L4		col-150	L3, L4		col-77	L4
col-154	np		col-156	np		col-79	L4
col-156	np		col-158	L3		col-88	L4
col-161	L4		col-160	L3, Ad		col-90	L2, L4
col-173	L2, L4		col-169	L3		col-91	np
col-175	L4		col-174	L2, L4		dpy-4	L2, L4
col-180	L3, L4		col-176	L3		lon-3	np
col-182	L2, L4		col-178	Ad		rol-1	L4
col-38	L4		col-179	Ad
col-39	L2, L3		col-182	L2, L4		L4	20
col-48	L4		col-19	Ad		Ad	1
col-49	L4		col-20	Ad
col-58	L2		col-38	L4
col-60	L4		col-46	L4, Ad
col-63	L4		col-48	L4
col-71	L4		col-49	L4		SPELL in Wormbase identifies 48 collagen genes that are regulated similarly to col-38, col-49 and col-63 across many conditions (column A)
col-73	L4		col-60	L4		Ectopic expression of LIN-29 upregulates expression of 49 collagen genes (column D; bold are those upregulated > 1.7X)
col-77	L4		col-63	L4		The overlap is 24 genes (bold; column G)
col-79	L4		col-69	L2, L4		The time of peak expression for each gene is shown (columns B, E, H: one value = > 50% total in that stage; two values = >30% total expression in those stages; 'np' = no peak by those criteria)
col-88	L4		col-71	L4
col-90	L2		col-73	L4
col-91	np		col-77	L4
col-97	L4		col-79	L4
dpy-4	L2, L4		col-8	Ad
dpy-5	L2, L4		col-80	Ad
ram-2	np		col-81	Ad
rol-1	L4		col-88	L4
lon-3	np		col-90	L2, L4
rol-6	L2		col-91	np
rol-8	L2		col-92	np
sqt-1	L2		dpy-4	L2, L4
sqt-2	L2, L4		lon-3	np
			rol-1	L4
L4	33
Ad	1		L4	25
			Ad	16
